# Supplementary material for: Biomechanical Risk Factors Associated with Running-Related Injuries: A Systematic Review
Source: Springer Nature journal article supplement (doi:10.1007/s40279-019-01110-z), 2019-04-26
Supplement: MOESM1 [file 16680452]

***Electronic Supplementary Material Table S1*.** Means, standard deviations and effect sizes for each included study.

| **Reference** | **n injured/un-injured** | **Outcome measure** | **Injured** | **Uninjured** | **P-valuea** | **ESb** |
| --- | --- | --- | --- | --- | --- | --- |
| **Bredeweg et al. (2013)** [44] | 34/176 | Symmetry of loading rate (SA) | 3.80 (2.92) | 3.33 (2.95) | NS | 0.16 |
| 34/176 | Symmetry of impact peak (SA) | 1.89 (1.88) | 2.75 (2.48) | .021 | 0.36 |
| 34/176 | Symmetry of peak vertical force (SA) | 2.31 (1.59) | 2.31 (1.34) | NS | 0.00 |
| 34/176 | Symmetry of ground contact time (SA) | 1.53 (1.04) | 1.50 (2.06) | .042 | 0.02 |
| 34/176 | Symmetry of step length (SA) | 0.43 (0.34) | 0.53 (0.45) | NS | 0.23 |
| 34/176 | Symmetry of time to vertical impact peak (SA) | 5.09 (3.59) | 5.13 (4.22) | NS | 0.01 |
| 34/176 | Symmetry of time to peak vertical force (SA) | 2.98 (4.03) | 2.00 (2.04) | NS | 0.40 |
| **Bredeweg et al. (2013)** [41] | 34/176c | Peak vertical force (BW) | 2.06 (0.25) | 2.09 (0.22) | NS | 0.13 |
| 34/176c | Vertical loading rate (BW/s) | 101.01 (28.42) | 96.30 (29.00) | NS | 0.16 |
| 34/176c | Vertical impact peak (BW) | 1.29 (0.19) | 1.34 (0.16) | NS | 0.30 |
| 34/176c | Step rate (Hz) | 2.73 (0.17) | 2.70 (0.17) | NS | 0.18 |
| 34/176c | Ground contact time (ms) | 224.32 (35.62) | 228.41 (27.83) | NS | 0.14 |
| 34/176c | Stride length (m) | 1.84 (0.11) | 1.86 (0.12) | NS | 0.17 |
| 34/176c | Time to vertical impact peak (ms) | 17.23 (6.0) | 19.01 (6.4) | NS | 0.28 |
| 34/176c | Time to peak vertical force (ms) | 109.45 (20.05) | 113.23 (16.03) | NS | 0.23 |
| 23/110d | Peak vertical force (BW) | 1.97 (0.26) | 2.00 (0.23) | NS | 0.13 |
| 23/110d | Vertical loading rate (BW/s) | 85.9 (22.2) | 88.3 (23.3) | NS | 0.10 |
| 23/110d | Vertical impact peak (BW) | 1.24 (0.18) | 1.28 (0.14) | NS | 0.27 |
| 23/110d | Step rate (Hz) | 2.62 (0.19) | 2.61 (0.22) | NS | 0.05 |
| 23/110d | Ground contact time (ms) | 260.7 (44.6) | 244.6 (43.8) | NS | 0.37 |
| 23/110d | Stride length (m) | 1.69 (0.10) | 1.69 (0.10) | NS | 0.00 |
| 23/110d | Time to vertical impact peak (ms) | 18.83 (5.1) | 19.80 (6.0) | NS | 0.17 |
| 23/110d | Time to peak vertical force (ms) | 123.0 (19.7) | 121.2 (17.0) | NS | 0.10 |
| 23/110e | Peak vertical force (BW) | 2.05 (0.28) | 2.09 (0.23) | NS | 0.17 |
| 23/110e | Vertical loading rate (BW/s) | 97.36 (28.08) | 102.10 (29.12) | NS | 0.16 |
| 23/110e | Vertical impact peak (BW) | 1.28 (0.19) | 1.34 (0.17) | NS | 0.35 |
| 23/110e | Step rate (Hz) | 2.73 (0.18) | 2.72 (0.17) | NS | 0.06 |
| 23/110e | Ground contact time (ms) | 229.75 (33.20) | 223.27 (29.01) | NS | 0.22 |
| 23/110e | Stride length (m) | 1.84 (0.12) | 1.85 (0.11) | NS | 0.09 |
| 23/110e | Time to vertical impact peak (ms) | 17.11 (5.16) | 17.62 (6.1) | NS | 0.09 |
| 23/110e | Time to peak vertical force (ms) | 112.0 (17.3) | 112.9 (17.2) | NS | 0.05 |
| 11/66f | Peak vertical force (BW) | 2.07 (0.20) | 2.06 (0.23) | NS | 0.04 |
| 11/66f | Vertical loading rate (BW/s) | 108.64 (27.60) | 86.58 (26.30) | <.050 | 0.83 |
| 11/66f | Vertical impact peak (BW) | 1.32 (0.18) | 1.33 (0.15) | NS | 0.06 |
| 11/66f | Step rate (Hz) | 2.73 (0.16) | 2.66 (0.16) | NS | 0.44 |
| 11/66f | Ground contact time (ms) | 213.04 (39.53) | 236.97 (26.30) | <.050 | 0.84 |
| 11/66f | Stride length (m) | 1.83 (0.09) | 1.89 (0.12) | NS | 0.52 |
| 11/66f | Time to vertical impact peak (ms) | 17.49 (7.4) | 21.32 (6.2) | NS | 0.60 |
| 11/66f | Time to peak vertical force (ms) | 104.3 (25.1) | 113.07 (14.07) | NS | 0.55 |
| 11/66g | Peak vertical force (BW) | 2.17 (0.20) | 2.13 (0.21) | NS | 0.19 |
| 11/66g | Vertical loading rate (BW/s) | 127.03 (39.72) | 96.71 (30.75) | <.050 | 0.94 |
| 11/66g | Vertical impact peak (BW) | 1.40 (0.24) | 1.38 (0.17) | NS | 0.11 |
| 11/66g | Step rate (Hz) | 2.81 (0.18) | 2.73 (0.19) | NS | 0.42 |
| 11/66g | Ground contact time (ms) | 204 .62 (36.34) | 220.26 (25.77) | NS | 0.57 |
| 11/66g | Stride length (m) | 1.98 (0.14) | 2.04 (0.13) | NS | 0.46 |
| 11/66g | Time to vertical impact peak (ms) | 15.65 (8.77) | 19.09 (5.79) | NS | 0.56 |
| 11/66g | Time to peak vertical force (ms) | 98.18 (21.12) | 106.17 (15.11) | NS | 0.50 |
| **Brund et al. (2017)h** [48] | NR | Mediolateral foot balance | NR | NR | / | / |
| **Davis et al. (2016)** [42] | 143/105i | Peak vertical force (BW) | 2.52 (0.17) | 2.53 (0.16) | NS | 0.06 |
| 136/102i | Vertical instantaneous loading rate (BW/s) | 81.1 (20.4) | 85.2 (22.7) | NS | 0.19 |
| 140/103i | Vertical average loading rate (BW/s) | 71.3 (18.7) | 73.6 (20.7) | NS | 0.12 |
| 143/105i | Vertical impact peak (BW) | 1.67 (0.29) | 1.66 (0.31) | NS | 0.03 |
| 11/21j | Peak vertical force (BW) | 2.53 (0.21) | 2.53 (0.16) | NS | 0.00 |
| 11/20j | Vertical instantaneous loading rate (BW/s) | 88.04 (13.93) | 73.06 (15.87) | .014 | 0.98 |
| 11/20j | Vertical average loading rate (BW/s) | 78.22 (11.10) | 60.73 (12.77) | .001 | 1.43 |
| 11/21j | Vertical impact peak (BW) | 1.72 (0.21) | 1.51 (0.22) | .013 | 0.97 |
| **Dudley et al. (2017)**  [37] | 12/19 | Peak hip adduction (°) | 13.97 (11.44-16.50)k | 12.66 (11.09-14.23)k | NS | / |
| 12/19 | Peak hip internal rotation (°) | 7.51 (4.95-10.07)k | 4.80 (1.24-8.36)k | NS | / |
| 12/19 | Peak knee abduction (°) | 3.48 (2.42-4.54)k | 4.25 (3.37-5.13)k | NS | / |
| 12/19 | Peak ankle eversion (°) | 6.01 (450-7.52)k | 6.15 (4.43-7.87)k | NS | / |
| 12/19 | Ankle eversion range of motion (°) | 14.41 (13.13-16.69)k | 12.87 (11.03-14.71)k | NS | / |
| 12/19 | Peak ankle eversion velocity (°/s) | 359.64 (270.70-448.58)k | 260.93 (212.22-309.64)k | .047 | / |
| 12/19 | Foot strike angle (°) | 11.21 (7.03-15.39)k | 10.95 (6.46-15.44)k | NS | / |
| 12/19 | Vertical instantaneous loading rate (BW/s) | 123.39 (107.11-139.67)k | 109.49 (94.60-124.38)k | NS | / |
| 12/19 | Vertical average loading rate (BW/s) | 68.25 (53.36-83.14)k | 58.07 (45.84-70.30)k | NS | / |
| 12/19 | Peak hip adduction moment (Nm/kg) | 3.38 (2.93-3.83)k | 3.14 (2.82-3.46)k | NS | / |
| 12/19 | Peak external knee adduction moment (Nm/kg) | 1.32 (1.08-1.56)k | 0.93 (0.78-1.08)k | .010 | / |
| **Ghani et al. (2009)** [46] | 27/104 | Laterally directed force distribution at first metatarsal contact ratio 1 | 0.001 (0.111) | -0.001 (0.214) | .029p | 0.01 |
| 27/104 | Laterally directed force distribution at first metatarsal contact ratio 2 | 0.001 (0.112) | -0.075 (0.214) | .031p | 0.38 |
| 27/104 | Laterally directed force distribution at first metatarsal contact ratio 3 | 0.001 (0.111) | -0.077 (0.214) | .029p | 0.39 |
| 27/104 | Laterally directed force distribution at first metatarsal contact ratio 8 | 1.053 (0.201) | 0.925 (0.268) | .013p | 0.50 |
| 27/104 | Laterally directed force distribution at forefoot flat ratio 1 | 0.021 (0.106) | -0.070 (0.113) | .038p | 0.82 |
| 27/104 | Laterally directed force distribution at forefoot flat ratio 3 | -0.023 (0.105) | -0.073 (0.111) | .031p | 0.46 |
| 27/104 | Displacement from medial to lateral in initial contact phase ratio 8 | 0.273 (0.194) | 0.192 (0.163) | .047p | 0.48 |
| 27/104 | Laterally directed center of force during heel-off | 2.897 (1.525) | 1.287 (4.093) | .004p | 0.43 |
| 27/104 | Laterally directed center of force during forefoot contact phase | 0.614 (1.438) | -1.569 (5.015) | .003p | 0.48 |
| 27/104 | Laterally directed center of force during foot flat phase | 2.135 (1.583) | 0.648 (4.456) | .014p | 0.37 |
| 27/104 | Medially directed center of force during forefoot push off phase | 2.105 (4.679) | 5.810 (12.870) | .023p | 0.32 |
| 27/104 | Velocity of mediolateral displacement of center of force at forefoot flat | 53.24 (75.57) | -22.97 (218.43) | .027p | 0.38 |
| 27/104 | Velocity of anteroposterior displacement of centre of force at forefoot flat | 2172.5 (756.3) | 1790.0 (1117.0) | .050p | 0.36 |
| 27/104 | Anteroposterior displacement of center of force at forefoot flat | 78.36 (12.49) | 88.04 (24.98) | .015p | 0.42 |
| 27/104 | Absolute force-time integral underneath metatarsal V | 12.314 (6.697) | 16.35 (8.25) | .011p | 0.51 |
| 27/104 | Vertical plantar peak force underneath metatarsal V | 113.1 (54.8) | 142.96 (64.87) | .020p | 0.47 |
| **Hein et al. (2014)**l  [38] | NR | Peak hip abduction (°) | NR | NR | NR | / |
| NR | Peak hip extension (°) | NR | NR | NR | / |
| NR | Hip flexion at touchdown (°) | NR | NR | NR | / |
| NR | Hip abduction at touchdown (°) | NR | NR | NR | / |
| NR | Hip flexion-extension range of motioin (°) | NR | NR | NR | / |
| NR | Hip abduction-adduction range of motion (°) | NR | NR | NR | / |
| NR | Hip flexion-extension motion velocity (°/s) | NR | NR | NR | / |
| NR | Hip adduction-abduction motion velocity (°/s) | NR | NR | NR | / |
| NR | Peak knee external rotation (°) | NR | NR | NR | / |
| 9/9 | Peak knee flexion (°) | 37 (7) | 41 (4) | NR | 0.70 |
| NR | Peak knee extension (°) | NR | NR | NR | / |
| NR | Knee flexion at touchdown (°) | NR | NR | NR | / |
| NR | Knee external rotation at touchdown (°) | NR | NR | NR | / |
| 9/9 | Knee flexion range of motion (°) | 26 (4) | 26 (3) | NR | 0.00 |
| 9/9 | Knee extension range of motion (°) | 25 (6) | 25 (6) | NR | 0.00 |
| NR | Knee internal-external rotation range of motion (°) | NR | NR | NR | / |
| NR | Knee flexion-extension motion velocity (°/s) | NR | NR | NR | / |
| NR | Knee internal-external rotation motion velocity (°/s) | NR | NR | NR | / |
| 8/8 | Peak ankle dorsiflexion (°) | 9 (3) | 14 (5) | NR | 1.21 |
| NR | Peak ankle plantar flexion (°) | NR | NR | NR | / |
| 8/8 | Peak rearfoot eversion (°) | -5 (3) | -3 (4) | NR | 0.57 |
| 8/8 | Peak rearfoot inversion (°) | 4 (3) | 5 (5) | NR | 0.24 |
| NR | Ankle dorsiflexion at touchdown (°) | NR | NR | NR | / |
| NR | Rearfoot inversion at touchdown (°) | NR | NR | NR | / |
| 8/8 | Ankle dorsiflexion range of motion (°) | 11 (2) | 13 (2) | NR | 1.00 |
| 8/8 | Ankle plantar flexion range of motion (°) | 35 (3) | 37 (5) | NR | 0.49 |
| 8/8 | Rearfoot eversion range of motion (°) | 8 (3) | 8 (2) | NR | 0.00 |
| 8/8 | Rearfoot inversion range of motion (°) | 9 (1) | 8 (6) | NR | 0.23 |
| NR | Ankle dorsiflexion-plantar flexion motion velocity (°/s) | NR | NR | NR | / |
| NR | Rearfoot eversion-inversion motion velocity (°/s) | NR | NR | NR | / |
| NR | Time to maximal rearfoot eversion (%ROPm) | NR | NR | NR | / |
| NR | Time to maximal hip flexion (%ROP) | NR | NR | NR | / |
| NR | Time to maximal hip adduction (%ROP) | NR | NR | NR | / |
| 9/9 | Time to maximal knee flexion (%ROP) | 34 (2) | 35 (3) | NR | 0.39 |
| NR | Time to maximal knee internal rotation (%ROP) | NR | NR | NR | / |
| 8/8 | Time to maximal ankle dorsiflexion (%ROP) | 43 (4) | 45 (1) | NR | 0.69 |
| **Kuhman et al. (2016)** [40] | 10/9 | Peak ankle eversion (°) | 8.1 (3.0) | 4.4 (4.2) | .045 | 1.02 |
| 10/9 | Ankle dorsiflexion range of motion (°) | 22.5 (6.1) | 22.3 (6.2) | NS | 0.03 |
| 10/9 | Ankle eversion range of motion (°) | 16.7 (2.5) | 20.4 (3.7) | .029 | 1.18 |
| 10/9 | Peak ankle eversion velocity (°/s) | 326.2 (94.8) | 478.6 (156.5) | .021 | 1.19 |
| 10/9 | Strike index (%) | 44.8 (50.0) | 55.8 (48.7) | NS | 0.22 |
| 10/9 | Vertical instantaneous loading rate (BW/s) | 93.5 (30.3) | 100.3 (19.9) | NS | 0.26 |
| 10/9 | Ankle eversion duration (s) | 0.12 (0.05) | 0.075 (0.06) | NS | 0.82 |
| **Luedke et al. (2016)n** [50] | NR | Step rate (steps/min) | NR | NR | NR | / |
| **Messier et al. (2018)** [39] | 199/101 | Peak knee flexion (°) | 40.0 (5.3) | 40.1 (4.7) | NSp | 0.02 |
| 199/101 | Peak rearfoot eversion (°) | -7.4 (3.5) | -7.4 (3.5) | NSp | 0.00 |
| 199/101 | Rearfoot eversion range of motion (°) | 13.4 (3.6) | 13.8 (3.7) | NSp | 0.11 |
| 199/101 | Peak ankle eversion velocity (°/s) | -182 (61) | -186 (61) | NSp | 0.07 |
| 199/101 | Forefoot angle (°) | -3.6 (7.1) | -4.5 (6.7) | NSp | 0.13 |
| 199/101 | Foot strike angle (°) | 6.0 (3.7) | 6.4 (3.6) | NSp | 0.11 |
| 199/101 | Strike index (%) | 12 (18) | 14 (20) | NSp | 0.11 |
| 199/101 | Peak braking force (N) | 204 (51) | 215 (50) | NSp | 0.22 |
| 199/101 | Vertical impact peak (N) | 1038 (237) | 1088 (239) | NSp | 0.21 |
| 199/101 | Vertical propulsive force (N) | 1585 (291) | 1677 (300) | NSp | 0.31 |
| 199/101 | Propulsive force (N) | 180 (43) | 192 (42) | NSp | 0.28 |
| 199/101 | Knee power absorption (W) | -546 (198) | -584 (196) | NSp | 0.19 |
| 199/101 | Knee negative work stance (J) | -30.4 (11.9) | -32.7 (11.5) | NSp | 0.20 |
| 199/101 | Peak external knee adduction moment (Nm) | -67.0 (29.0) | -72.8 (26.9) | NSp | 0.20 |
| 199/101 | Peak knee extension moment (Nm) | 142.4 (44.1) | 149.2 (43.8) | NSp | 0.15 |
| 199/101 | Peak knee joint stiffness (Nm/°) | 6.89 (2.65) | 6.72 (2.03) | .030 | 0.07 |
| **Napier et al. (2018)o** [43] | NR | Peak vertical force (BW) | NR | NR | NR | / |
| NR | Peak braking force (BW) | NR | NR | NR | / |
| NR | Vertical instantaneous loading rate (BW/s) | NR | NR | NR | / |
| NR | Vertical average loading rate (BW/s) | NR | NR | NR | / |
| NR | Vertical impact transient (BW) | NR | NR | NR | / |
| NR | Vertical impulse (BW*s) | NR | NR | NR | / |
| **Noehren et al. (2007)** [36] | 17/18 | Peak hip adduction (°) | 14.1 (2.5) | 10.6 (5.1) | .010 | 0.86 |
| 17/16 | Peak knee internal rotation (°) | 3.9 (3.7) | 0.02 (4.6) | .010 | 0.93 |
| 18/18 | Knee flexion at touchdown (°) | -11.8 (4.78) | -14.4 (6.03) | NS | 0.48 |
| 18/17 | Peak rearfoot eversion (°) | 9.7 (3.3) | 11.6 (2.5) | NS | 0.65 |
| 18/18 | Peak hip adduction moment (Nm) | -1.4 (0.37) | -1.3 (0.19) | NS | 0.34 |
| 18/16 | Peak knee external rotation moment (Nm) | -0.12 (0.12) | -0.09 (0.05) | NS | 0.32 |
| 18/16 | Peak rearfoot inversion moment (Nm) | -0.15 (0.10) | -0.13 (0.09) | NS | 0.21 |
| **Noehren et al. (2013)** [35] | 15/15 | Peak hip adduction (°) | 12.1 (2.8) | 8.1 (4.5) | .007 | 1.07 |
| 15/15 | Peak hip internal rotation (°) | 4.5 (5.2) | 3.0 (6.1) | NS | 0.26 |
| 15/15 | Peak rearfoot eversion (°) | 6.2 (2.39) | 10.4 (4.2) | NS | 1.23 |
| **Stefanyshyn et al. (2006)** [49] | 6/6 | Internal knee abduction moment impulse (Nms) | 9.2 (3.7) | 4.7 (3.5) | .042 | 1.28 |
| **Thijs et al. (2008)** [45] | 17/85 | Vertical plantar peak force underneath hallux (N) | 174.54 (68.58) | 151.67 (92.30) | NSp | 0.26 |
| 17/85 | Vertical plantar peak force underneath metatarsal I (N) | 244.85 (172.64) | 210.97 (118.52) | NSp | 0.26 |
| 17/85 | Vertical plantar peak force underneath metatarsal II (N) | 366.44 (121.94) | 286.97 (122.25) | .037p | 0.65 |
| 17/85 | Vertical plantar peak force underneath metatarsal III (N) | 308.06 (69.43) | 245.77 (109.12) | NSp | 0.60 |
| 17/85 | Vertical plantar peak force underneath metatarsal IV (N) | 239.79 (66.40) | 195.25 (90.89) | NSp | 0.51 |
| 17/85 | Vertical plantar peak force underneath metatarsal V (N) | 148.35 (78.65) | 115.30 (71.24) | NSp | 0.46 |
| 17/85 | Vertical plantar peak force underneath medial heel (N) | 478.34 (182.24) | 409.38 (211.21) | NSp | 0.33 |
| 17/85 | Vertical plantar peak force underneath lateral heel (N) | 514.68 (255.78) | 402.46 (218.63) | NSp | 0.50 |
| 17/85 | Time to vertical plantar peak force underneath hallux relative to total time of foot contact (s) | 0.717 (0.071) | 0.713 (0.060) | NSp | 0.06 |
| 17/85 | Time to vertical plantar peak force underneath metatarsal I relative to total time of foot contact (s) | 0.562 (0.049) | 0.578 (0.052) | NSp | 0.31 |
| 17/85 | Time to vertical plantar peak force underneath metatarsal II relative to total time of foot contact (s) | 0.578 (0.040) | 0.574 (0.040) | NSp | 0.10 |
| 17/85 | Time to vertical plantar peak force underneath metatarsal III relative to total time of foot contact (s) | 0.548 (0.040) | 0.551 (0.039) | NSp | 0.08 |
| 17/85 | Time to vertical plantar peak force underneath metatarsal IV relative to total time of foot contact (s) | 0.515 (0.034) | 0.505 (0.041) | NSp | 0.25 |
| 17/85 | Time to vertical plantar peak force underneath metatarsal V relative to total time of foot contact (s) | 0.480 (0.041) | 0.461 (0.057) | NSp | 0.35 |
| 17/85 | Time to vertical plantar peak force underneath medial heel relative to total time of foot contact (s) | 0.061 (0.042) | 0.081 (0.043) | NSp | 0.47 |
| 17/85 | Time to vertical plantar peak force underneath lateral heel relative to total time of foot contact (s) | 0.040 (0.018) | 0.054 (0.026) | .037p | 0.56 |
| 17/85 | Mediolateral force distribution | NR | NR | NRp | / |
| **Van Ginckel et al. (2009)** [47] | 10/53 | Mediolateral displacement of center of force at forefoot contact (mm) | 0.35 (2.99) | -0.10 (2.10) | NSp | 0.20 |
| 10/53 | Mediolateral displacement of center of force at first metatarsal contact (mm) | 0.44 (2.71) | -0.04 (2.02) | NSp | 0.22 |
| 10/53 | Mediolateral displacement of center of force at forefoot flat (mm) | 1.03 (4.4) | 0.40 (2.74) | NSp | 0.21 |
| 10/53 | Mediolateral displacement of center of force at heel off (mm) | 2.92 (3.91) | 2.60 (2.02) | NSp | 0.13 |
| 10/53 | Mediolateral displacement of center of force at last foot contact (mm) | 2.39 (6.62) | 4.52 (4.61) | NSp | 0.43 |
| 10/53 | Mediolateral displacement of center of force at initial contact phase (mm) | 0.10 (1.16) | 0.07 (1.25) | NSp | 0.02 |
| 10/53 | Mediolateral displacement of center of force at forefoot contact phase (mm) | 0.59 (2.75) | 0.43 (1.70) | NSp | 0.08 |
| 10/53 | Mediolateral displacement of center of force at foot flat phase (mm) | 1.89 (2.73) | 2.20 (1.99) | NSp | 0.15 |
| 10/53 | Mediolateral displacement of center of force at forefoot push off phase (mm) | -0.53 (10.42) | 1.92 (5.40) | NSp | 0.38 |
| 10/53 | Total mediolateral displacement of center of force (mm) | 13.17 (3.99) | 14.92 (3.00) | NSp | 0.55 |
| 10/53 | Anteroposterior displacement of center of force at first metatarsal contact (mm) | 35.88 (5.12) | 38.75 (5.79) | NSp | 0.50 |
| 10/53 | Anteroposterior displacement of center of force at forefoot flat (mm) | 76.28 (15.83) | 78.35 (12.81) | NSp | 0.16 |
| 10/53 | Anteroposterior displacement of center of force at heel off (mm) | 177.90 (8.73) | 183.92 (11.43) | NSp | 0.54 |
| 10/53 | Anteroposterior displacement of center of force at last foot contact (mm) | 233.80 (13.31) | 247.35 (14.45) | NSp | 0.95 |
| 10/53 | Anteroposterior displacement of center of force at initial contact phase (mm) | 12.11 (6.54) | 14.51 (4.80) | NSp | 0.47 |
| 10/53 | Anteroposterior displacement of center of force at forefoot contact phase (mm) | 40.41 (17.48) | 39.60 (12.79) | NSp | 0.06 |
| 10/53 | Anteroposterior displacement of center of force at foot flat phase (mm) | 101.62 (13.40) | 105.57 (15.76) | NSp | 0.26 |
| 10/53 | Anteroposterior displacement of center of force at forefoot push off phase (mm) | 55.90 (10.41) | 63.44 (9.98) | NSp | 0.75 |
| 10/53 | Total anteroposterior displacement of center of force (mm) | 233.84 (13.27) | 247.43 (14.43) | .015p | 0.95 |
| 10/53 | First contact hallux (s) | 0.08 (0.04) | 0.07 (0.02) | NSp | 0.42 |
| 10/53 | First contact metatarsal I (s) | 0.04 (0.01) | 0.04 (0.01) | NSp | 0.00 |
| 10/53 | First contact metatarsal II (s) | 0.03 (0.01) | 0.04 (0.01) | NSp | 1.00 |
| 10/53 | First contact metatarsal III (s) | 0.03 (0.01) | 0.03 (0.01) | NSp | 0.00 |
| 10/53 | First contact metatarsal IV (s) | 0.02 (0.01) | 0.02 (0.01) | NSp | 0.00 |
| 10/53 | First contact metatarsal V (s) | 0.02 (0.01) | 0.03 (0.02) | NSp | 0.53 |
| 10/53 | First contact medial heel (s) | 0.00 (0.00) | 0.00 (0.00) | NSp | 0.00 |
| 10/53 | First contact lateral heel (s) | 0.00 (0.00) | 0.00 (0.00) | NSp | 0.00 |
| 10/53 | End contact hallux (s) | 0.27 (0.04) | 0.28 (0.04) | NSp | 0.25 |
| 10/53 | End contact metatarsal I (s) | 0.24 (0.03) | 0.25 (0.03) | NSp | 0.33 |
| 10/53 | End contact metatarsal II (s) | 0.25 (0.03) | 0.26 (0.03) | NSp | 0.33 |
| 10/53 | End contact metatarsal III (s) | 0.25 (0.03) | 0.26 (0.03) | NSp | 0.33 |
| 10/53 | End contact metatarsal IV (s) | 0.24 (0.03) | 0.25 (0.03) | NSp | 0.33 |
| 10/53 | End contact metatarsal V (s) | 0.21 (0.03) | 0.21 (0.03) | NSp | 0.00 |
| 10/53 | End contact medial heel (s) | 0.14 (0.02) | 0.14 (0.02) | NSp | 0.00 |
| 10/53 | End contact lateral heel (s) | 0.13 (0.02) | 0.14 (0.02) | NSp | 0.50 |
| 10/53 | Timing of the instants of foot roll-over at first metatarsal contact (s) | 0.02 (0.01) | 0.02 (0.01) | NSp | 0.00 |
| 10/53 | Timing of the instants of foot roll-over at forefoot flat (s) | 0.04 (0.01) | 0.05 (0.02) | NSp | 0.53 |
| 10/53 | Timing of the instants of foot roll-over at heel off (s) | 0.14 (0.02) | 0.14 (0.02) | NSp | 0.00 |
| 10/53 | Vertical plantar peak force underneath hallux (N) | 149.21 (53.17) | 161.03 (106.49) | NSp | 0.12 |
| 10/53 | Vertical plantar peak force underneath metatarsal I (N) | 228.62 (115.18) | 205.27 (111.03) | NSp | 0.21 |
| 10/53 | Vertical plantar peak force underneath metatarsal II (N) | 285.70 (66.28) | 280.64 (110.33) | NSp | 0.05 |
| 10/53 | Vertical plantar peak force underneath metatarsal III (N) | 253.84 (73.15) | 236.06 (100.51) | NSp | 0.18 |
| 10/53 | Vertical plantar peak force underneath metatarsal IV (N) | 213.68 (59.32) | 184.64 (73.82) | NSp | 0.40 |
| 10/53 | Vertical plantar peak force underneath metatarsal V (N) | 153.83 (72.76) | 107.78 (50.80) | NSp | 0.84 |
| 10/53 | Vertical plantar peak force underneath medial heel (N) | 476.13 (166.10) | 409.91 (211.66) | NSp | 0.32 |
| 10/53 | Vertical plantar peak force underneath lateral heel (N) | 481.78 (179.34) | 392.35 (199.68) | NSp | 0.45 |
| 10/53 | Time to vertical plantar peak force underneath hallux (s) | 0.19 (0.04) | 0.20 (0.03) | NSp | 0.32 |
| 10/53 | Time to vertical plantar peak force underneath metatarsal I (s) | 0.16 (0.03) | 0.16 (0.03) | NSp | 0.00 |
| 10/53 | Time to vertical plantar peak force underneath metatarsal II (s) | 0.16 (0.03) | 0.16 (0.02) | NSp | 0.00 |
| 10/53 | Time to vertical plantar peak force underneath metatarsal III (s) | 0.15 (0.02) | 0.16 (0.02) | NSp | 0.50 |
| 10/53 | Time to vertical plantar peak force underneath metatarsal IV (s) | 0.14 (0.02) | 0.14 (0.02) | NSp | 0.00 |
| 10/53 | Time to vertical plantar peak force underneath metatarsal V (s) | 0.12 (0.02) | 0.13 (0.02) | NSp | 0.50 |
| 10/53 | Time to vertical plantar peak force underneath medial heel (s) | 0.02 (0.01) | 0.02 (0.01) | NSp | 0.00 |
| 10/53 | Time to vertical plantar peak force underneath lateral heel (s) | 0.01 (0.00) | 0.02 (0.01) | NSp | 1.08 |
| 10/53 | Relative time to vertical plantar peak force underneath hallux (%) | 69.15 (8.41) | 71.00 (5.00) | NSp | 0.33 |
| 10/53 | Relative time to vertical plantar peak force underneath metatarsal I (%) | 57.78 (3.59) | 57.00 (5.00) | NSp | 0.16 |
| 10/53 | Relative time to vertical plantar peak force underneath metatarsal II (%) | 57.41 (4.02) | 57.00 (3.00) | NSp | 0.13 |
| 10/53 | Relative time to vertical plantar peak force underneath metatarsal III (%) | 54.62 (4.20) | 55.00 (4.00) | NSp | 0.09 |
| 10/53 | Relative time to vertical plantar peak force underneath metatarsal IV (%) | 48.96 (3.18) | 51.00 (4.00) | NSp | 0.52 |
| 10/53 | Relative time to vertical plantar peak force underneath metatarsal V (%) | 44.80 (4.57) | 47.00 (5.00) | NSp | 0.44 |
| 10/53 | Relative time to vertical plantar peak force underneath medial heel (%) | 5.72 (2.01) | 8.00 (3.00) | NSp | 0.79 |
| 10/53 | Relative time to vertical plantar peak force underneath lateral heel (%) | 4.46 (1.50) | 5.00 (2.00) | NSp | 0.28 |
| 10/53 | Absolute force-time integral underneath hallux (Ns) | 17.13 (6.67) | 20.05 (15.63) | NSp | 0.20 |
| 10/53 | Absolute force-time integral underneath metatarsal I (Ns) | 28.37 (16.64) | 25.50 (14.31) | NSp | 0.20 |
| 10/53 | Absolute force-time integral underneath metatarsal II (Ns) | 38.99 (11.80) | 38.16 (15.74) | NSp | 0.05 |
| 10/53 | Absolute force-time integral underneath metatarsal III (Ns) | 34.60 (10.93) | 31.91 (13.54) | NSp | 0.20 |
| 10/53 | Absolute force-time integral underneath metatarsal IV (Ns) | 26.94 (8.03) | 23.06 (9.40) | NSp | 0.42 |
| 10/53 | Absolute force-time integral underneath metatarsal V (Ns) | 16.79 (8.83) | 11.49 (6.08) | NSp | 0.81 |
| 10/53 | Absolute force-time integral underneath medial heel (Ns) | 35.99 (16.02) | 32.91 (19.56) | NSp | 0.16 |
| 10/53 | Absolute force-time integral underneath lateral heel (Ns) | 26.17 (14.37) | 24.35 (15.15) | NSp | 0.12 |
| 10/53 | Relative force-time integral underneath hallux (%) | 15.07 (6.82) | 16.12 (7.23) | NSp | 0.15 |
| 10/53 | Relative force-time integral underneath metatarsal I (%) | 22.00 (7.22) | 21.36 (6.02) | NSp | 0.10 |
| 10/53 | Relative force-time integral underneath metatarsal II (%) | 32.12 (4.67) | 32.86 (4.56) | NSp | 0.16 |
| 10/53 | Relative force-time integral underneath metatarsal III (%) | 29.28 (6.49) | 27.88 (4.55) | NSp | 0.29 |
| 10/53 | Relative force-time integral underneath metatarsal IV (%) | 22.88 (4.68) | 21.22 (6.28) | NSp | 0.27 |
| 10/53 | Relative force-time integral underneath metatarsal V (%) | 13.74 (5.25) | 10.98 (4.57) | NSp | 0.59 |
| 10/53 | Relative force-time integral underneath medial heel (%) | 30.07 (9.76) | 28.88 (9.79) | NSp | 0.12 |
| 10/53 | Relative force-time integral underneath lateral heel (%) | 21.67 (8.62) | 21.48 (8.03) | NSp | 0.02 |
| 10/53 | Mediolateral force ratio 1 at forefoot contact | -0.15 (0.11) | -0.15 (0.09) | NSp | 0.00 |
| 10/53 | Mediolateral force ratio 1 at first metatarsal contact | -0.02 (0.08) | 0.00 (0.08) | NSp | 0.25 |
| 10/53 | Mediolateral force ratio 1 at forefoot flat | -0.03 (0.09) | 0.02 (0.10) | NSp | 0.51 |
| 10/53 | Mediolateral force ratio 1 at heel off | 0.10 (0.10) | 0.15 (0.09) | NSp | 0.55 |
| 10/53 | Mediolateral force ratio 1 at last foot contact | 0.00 (0.00) | 0.01 (0.04) | NSp | 0.27 |
| 10/53 | Mediolateral force ratio 1 at initial contact phase | 0.13 (0.11) | 0.15 (0.10) | NSp | 0.20 |
| 10/53 | Mediolateral force ratio 1 at forefoot contact phase | -0.01 (0.06) | 0.02 (0.09) | NSp | 0.35 |
| 10/53 | Mediolateral force ratio 1 at footflat phase | 0.14 (0.15) | 0.13 (0.10) | NSp | 0.09 |
| 10/53 | Mediolateral force ratio 1 at forefoot push off phase | -0.10 (0.10) | -0.14 (0.12) | NSp | 0.34 |
| 10/53 | Mediolateral force ratio 2 at forefoot contact | 0.00 (0.00) | -0.01 (0.04) | NSp | 0.27 |
| 10/53 | Mediolateral force ratio 2 at first metatarsal contact | -0.50 (0.39) | -0.38 (0.26) | NSp | 0.42 |
| 10/53 | Mediolateral force ratio 2 at forefoot flat | -0.27 (0.13) | -0.17 (0.11) | .016p | 0.88 |
| 10/53 | Mediolateral force ratio 2 at heel off | 0.06 (0.08) | 0.08 (0.06) | NSp | 0.32 |
| 10/53 | Mediolateral force ratio 2 at last foot contact | 0.00 (0.00) | 0.00 (0.02) | NSp | 0.00 |
| 10/53 | Mediolateral force ratio 2 at initial contact phase | -0.50 (0.39) | -0.37 (0.25) | NSp | 0.47 |
| 10/53 | Mediolateral force ratio 2 at forefoot contact phase | 0.23 (0.31) | 0.21 (0.20) | NSp | 0.12 |
| 10/53 | Mediolateral force ratio 2 at foot flat phase | 0.33 (0.15) | 0.25 (0.12) | NSp | 0.64 |
| 10/53 | Mediolateral force ratio 2 at forefoot push off phase | -0.06 (0.08) | -0.08 (0.07) | NSp | 0.28 |

aSignificant result if P-value .05

bHedges’ g effect size

cTotal group of participants, both male and female, running at 9km/h during testing

dFemale participants running at 8km/h during testing

eFemale participants running at 9km/h during testing

fMale participants running at 9km/h during testing

gMale participants running at 10km/h during testing

hIn this study runners were divided into two groups based on lateral or medial shod pressure, therefore no distinct groups were made between injured and uninjured runners

iComparison of the runners who sustained an injury and those who remained uninjured

jComparison of the runners who sought medical attention for their injury and those who never sustained an injury before and remained uninjured

kThe 95% confidence interval is shown here as standard deviations were not reported

lNo statistical analysis was performed in this study, therefore no P-values were reported

m%ROP, indicated roll-over process/stand phase

nIn this study runners were divided into groups based on tertiles in step rate, therefore no distinct groups were made between injured and uninjured runners

oIn this study runners were divided into groups based on tertiles in predictor variables, therefore no distinct groups were made between injured and uninjured runners

pSignificance is based on results of logistic regression analysis

ES: effect size, SA: symmetry angle, BW: body weight, Hz: hertz, M: meter, Ms: millisecond, s: second, °: degrees, N: newton, Nm: newtonmeter, Ns: newtonsecond, Kg: kilogram, ROP: roll-over process, mm: millimeters

**Biomechanical risk factors associated with running-related injuries: a systematic review**

**Sports Medicine**

**Linde Ceyssens, Romy Vanelderen, Christian Barton, Peter Malliaras, Bart Dingenen**

**Reval Rehabilitation Research Center, Faculty of Rehabilitation Sciences, Hasselt University. E-mail: bart.dingenen@uhasselt.be.**
